# Supplementary material for: Discriminative light-up detection of volatile chlorinated solvents and dual-phase encrypted security ink
Source: Royal Society of Chemistry journal article supplement (doi:10.1039/d2ma00319h), 2022-01-01
Supplement: d2ma00319h1.pdf [file d2ma00319h1.pdf]

## Electronic Supplementary Information

### Discriminative Light-up Detection of Volatile Chlorinated Solvents and Dual-Phase Encrypted Security Ink

Retwik Parui,<sup>[a]</sup> Niranjan Meher,<sup>[a],[b]</sup> and Parameswar Krishnan Iyer<sup>\*[a],[c]</sup>

<sup>a</sup>Department of Chemistry, Indian Institute of Technology Guwahati, Guwahati-781039, India.

<sup>b</sup>Currently at Department of Radiology and Biomedical Imaging, University of California San Francisco, CA-94107, USA

<sup>c</sup>Centre for Nanotechnology, Indian Institute of Technology Guwahati, Guwahati-781039, India

| SI No | Content                                                  | Page No. |
|-------|----------------------------------------------------------|----------|
| 1     | Experimental Section                                     | S2       |
| 2     | Comparison table                                         | S4       |
| 3     | Effect of 365 nm light exposure                          | S5       |
| 4     | Selectivity studies in liquid phase                      | S6       |
| 5     | Photo-luminescence kinetics spectra                      | S7       |
| 6     | UV/Visible spectra                                       | S8       |
| 7     | Table for CIE coordinates                                | S8       |
| 8     | TRPL Study                                               | S9       |
| 9     | ESR Spectra                                              | S10      |
| 10    | Fluorescence change in presence of radical scavenger     | S11      |
| 11    | Temperature dependent luminescence spectra               | S11      |
| 12    | NMR and FTIR titration                                   | S12      |
| 13    | Electrostatic potential diagram                          | S14      |
| 14    | Vapour phase study                                       | S14      |
| 15    | <sup>1</sup> H-NMR, <sup>13</sup> C-NMR and Mass Spectra | S17      |
| 16    | References                                               | S21      |

## 1. Experimental Section

### 1.1. Materials and methods

All precursor materials and reagents (1,8-Diaminonaphthalene, phenylboronic acid, methyl boronic acid, benzaldehyde) were purchased from Sigma Aldrich (INDIA) and were of reagent grade. HPLC grade solvents were purchased from Zenith India and Northeast Chemicals. NMR ( $^1\text{H}$ ,  $^{13}\text{C}$ ) spectra were recorded with a Varian-AS400 NMR spectrometer or Bruker Avance 600 MHz spectrometer. All solutions for  $^1\text{H}$  and  $^{13}\text{C}$  spectra were obtained taking residual solvent signal as internal reference. Electro spray ionization mass (ESI-MS) spectra were recorded on a Waters (Micro mass MS-Technologies) Q-ToF MS Analyzer spectrometer. Microbalance ( $\pm 0.1\text{mg}$ ) and volumetric glassware were used for the preparation of solutions. UV/vis and PL spectra were recorded on a Perkin-Elmer Model Lambda-750 spectrophotometer and a Horiba Fluoromax-4 spectrofluorometer respectively using 4 mm quartz cuvettes at 298 K.

### 1.2. Syntheses of Compounds<sup>1</sup>

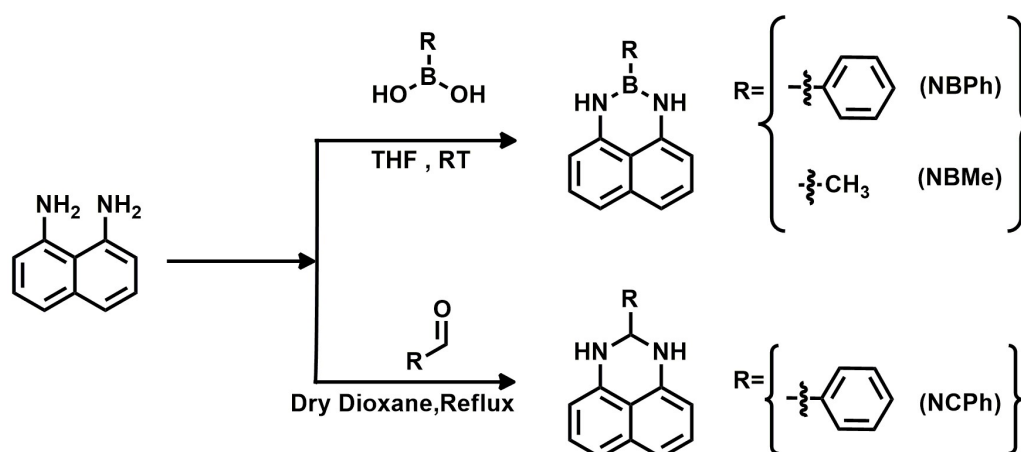

**Scheme S1:** Synthetic route for the preparation of **NCPH**, **NBMe**, **NBPh** molecules.

#### 1.2.1. Syntheses of Compounds NBPh and NBMe

At room temperature naphthalene-1,8-diamine (100 mg, 0.633 m.mol) and phenylboronic acid (78 mg, 0.633 m.mol for **NBPh**) or methyl boronic acid (38 mg, 0.633 m.mol for **NBMe**) was taken in 50 mL round bottom flask and 10 mL THF was added as a solvent. Then the mixture was stirred for 15 hours at room temperature. After the reaction was over, the mixture was cooled to room temperature, solvent evaporated using rotatory evaporator under low pressure. The mixture was washed with water and extracted with ethyl acetate. The organic phase was dried over anhydrous sodium sulphate and dried using rotatory evaporator. The residue was purified by column chromatography over silica gel using 2% ethyl acetate in hexane to obtain the pure product.

**Characterization Data of NBPh:** Grey colored solid (105 mg, 68.08% yield),  $^1\text{H}$  NMR (600 MHz,  $\text{CDCl}_3$ )  $\delta$  7.66 (d,  $J = 7.1$  Hz, 2H), 7.50 – 7.44 (m, 3H), 7.16 (t,  $J = 7.7$  Hz, 2H), 7.07 (d,  $J = 8.2$  Hz, 2H), 6.43 (d,  $J = 7.3$  Hz, 2H), 6.04 (s, 2H).  $^{13}\text{C}$  NMR (150 MHz,  $\text{CDCl}_3$ )  $\delta$  141.22, 136.53, 131.57,

130.42, 128.42, 127.76, 120.02, 118.00, 106.18. HRMS (+ ESI): Calculated for C<sub>16</sub>H<sub>13</sub>BN<sub>2</sub>, 244.1182 [M] +.

**Characterization Data of NBMe:** Grey colored solid (84 mg, 73.04% yield), <sup>1</sup>H NMR (600 MHz, CDCl<sub>3</sub>) δ 7.09 (t, *J* = 7.8 Hz, 2H), 7.00 (d, *J* = 8.2 Hz, 2H), 6.28 (d, *J* = 7.3 Hz, 2H), 5.62 (s, 2H), 0.35 (s, 3H). <sup>13</sup>C NMR (150 MHz, CDCl<sub>3</sub>) δ 141.36, 136.45, 127.68, 119.55, 117.48, 105.47, 8.70. HRMS (+ ESI): Calculated for C<sub>16</sub>H<sub>11</sub>BN<sub>2</sub>, Found 183.1090 [M+H] +.

### 1.2.2. Syntheses of Compounds NCPH

Naphthalene-1,8-diamine (100 mg, 0.633 m.mol) and benzaldehyde (193 μL, 0.633) was taken in 50 mL round bottom flask and 10 mL dry dioxane was added as a solvent under inert condition. The reaction mixture was stirred for 24h at 90 °C temperature, followed by evaporation using rotatory evaporator under low pressure. The mixture was washed with water and extracted with ethyl acetate and the organic phase was dried over anhydrous sodium sulphate and evaporated using rotatory evaporator. The residue was purified by column chromatography over silica gel using 3% ethyl acetate in hexane to obtain the pure product.

**Characterization Data of NCPH:** Light yellow powder (70 mg, 44.96% yield), <sup>1</sup>H NMR (600 MHz, CDCl<sub>3</sub>) δ 7.57 (dd, *J* = 6.4, 2.8 Hz, 2H), 7.38 (dd, *J* = 4.8, 1.6 Hz, 3H), 7.20 – 7.15 (m, 4H), 6.46 (dd, *J* = 7.1, 0.7 Hz, 2H), 5.40 (s, 1H), 4.51 (s, 2H). <sup>13</sup>C NMR (150 MHz, CDCl<sub>3</sub>) δ 142.17, 140.12, 135.01, 129.77, 128.99, 128.06, 127.01, 118.06, 113.58, 106.01, 68.56. HRMS (+ESI): Calculated for C<sub>17</sub>H<sub>14</sub>N<sub>2</sub>, Found 247.1230 [M+H] +.

### 1.3. Sensing Studies

Stock solution for all the three probes (**NBMe**, **NBPh**, **NCPH**) were prepared at a concentration of 10 mM in 1 mL methanol and was diluted further into 20 μM solution in chloroform in a sealed cuvette at the time of sensing titration experiments and emission spectra was recorded under 330 nm excitation up to 15 min. The UV/visible spectra of the same solution was recorded before (at 0 min) and after (at 15 min) the 330 nm light excitation. For the interference study, the 10 mM methanol stock solution was diluted into 20 μM concentration in the corresponding solvents for all the probes and followed the same procedure of chloroform titration.

### 1.4. Fluorescence quantum yield calculation:

The change in fluorescence quantum yield of all the three probes (**NBMe**, **NBPh**, **NCPH**) were calculated using quinine sulfate (Φ<sub>r</sub> = 0.52 in 0.1N H<sub>2</sub>SO<sub>4</sub>) as standard and it was determined by the below equation:

$$\Phi_s = \Phi_r (A_r E_s / A_s E_r) (\eta_s^2 / \eta_r^2)$$

Where, Subscripts 'r' and 's' refer to the reference and sample fluorophore respectively. A and E denote Absorbance and Integrated fluorescence emission intensity.  $\eta$  is the refractive index of the used solvent.

## 2. Comparison table

**Table S1:** Represents a comparison of detection limit, detection method, selectivity of the probe, and discriminative features for existing material with the present work in chloroform detection

| Publication                                                        | Material used                       | Detection limit | Selectivity | Method                      | Solvent Discrimination                                                  | Ref          |
|--------------------------------------------------------------------|-------------------------------------|-----------------|-------------|-----------------------------|-------------------------------------------------------------------------|--------------|
| <b>Present Work</b>                                                | <b>Organic Small molecule</b>       | <b>7.95 ppm</b> | <b>Yes</b>  | Fluorometric & Colorimetric | Chloroform, carbon tetrachloride, chlorobenzene and 1,2-dichloromethane | -            |
| <i>Nat. Commun.</i> , <b>2013</b> , 4, 2461                        | Polymer                             | -               | Yes         | Fluorometric & Colorimetric | Chloroform and 1,2-dichloromethane                                      | <sup>2</sup> |
| <i>ACS Appl. Mater. Interfaces</i> , <b>2018</b> , 10, 33730-33736 | Organic phosphor                    | < 5 ppm         | Yes         | Phosphorescence             | -                                                                       | <sup>3</sup> |
| <i>Molecules</i> , <b>2017</b> , 22, 1306                          | Copolymer                           | <150 ppm        | NO          | Fluorometric                | -                                                                       | <sup>4</sup> |
| <i>Sensors and Actuators B</i> , <b>2013</b> , 183, 25-33          | Nanocomposite                       | 50 ppm          | No          | Electrical conductivity     | -                                                                       | <sup>5</sup> |
| <i>Composites Part B</i> , <b>2019</b> 173, 106894                 | Nanocomposite                       | 50 ppm          | Yes         | Electrical conductivity     | -                                                                       | <sup>6</sup> |
| <i>J. Mater. Chem. A</i> , <b>2013</b> , 1, 10327                  | Composite material                  | 30 ppm          | Yes         | Electrical conductivity     | -                                                                       | <sup>7</sup> |
| <i>Chem. Commun.</i> , <b>2016</b> , 52, 2095                      | Napthalimide based organic molecule | NO              | Yes         | Fluorometric                | Halogenated and non-halogenated                                         | <sup>8</sup> |

|                                                                    |                                |                        |     |                                     |                                 |    |
|--------------------------------------------------------------------|--------------------------------|------------------------|-----|-------------------------------------|---------------------------------|----|
| <i>Chem. Eur. J.</i> , <b>2017</b> , <i>23</i> , 12559-12564       | MOF                            | $2.5 \times 10^{-5}$ M | Yes | Colorimetric                        | -                               | 9  |
| <i>RSC Adv.</i> , <b>2017</b> , <i>7</i> , 18132-18135             | Pyridinium 5-aminothiazoles    | -                      | Yes | Fluorometric<br>And<br>Colorimetric | Halogenated and non-halogenated | 10 |
| <i>Macromolecules</i> , <b>2017</b> , <i>50</i> , 4927-4934        | Polymer                        | -                      | NO  | FTIR                                | -                               | 11 |
| <i>Sensors and Actuators B</i> , <b>2018</b> , <i>261</i> , 97-105 | Polyaniline                    | 9.22 ppm               | Yes | Bragg wavelength shift              | -                               | 12 |
| <i>Sensors and Actuators A</i> , <b>2019</b> , <i>296</i> , 87-91  | Graphene-polymer Nanocomposite | 30 ppm                 | Yes | Visual Shape switching phenomena    | NO                              | 13 |

### 3. Effect of 365 nm light exposure

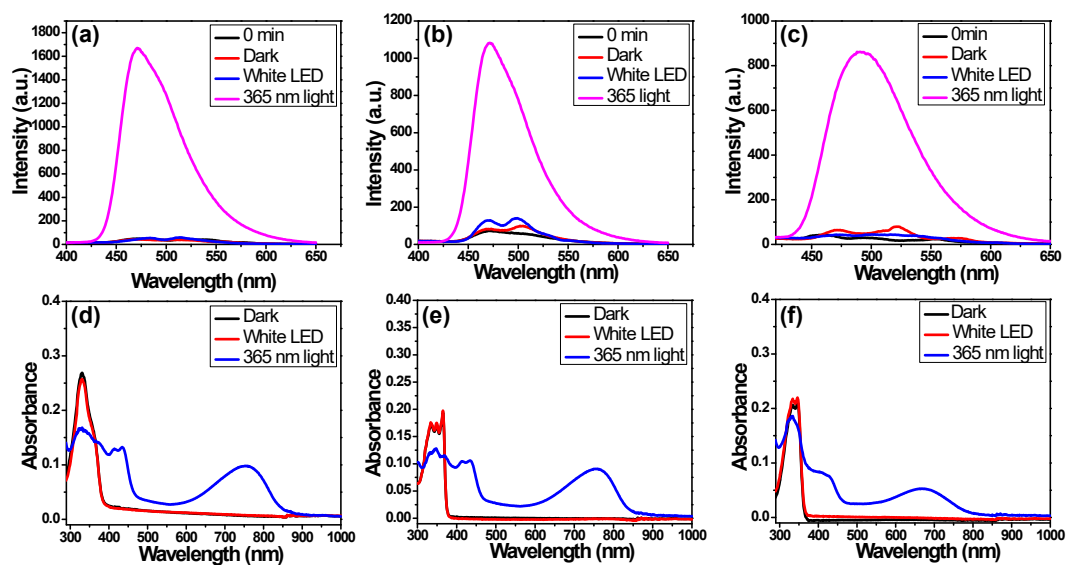

**Fig. S1:** Fluorescence spectra of (a) **NBPh** (b) **NBMe** (c) **NCPH** in chloroform ( $20 \mu\text{M}$ ) in dark and on exposure to different light sources for 15 min. UV/visible spectra of (d) **NBPh** (e) **NBMe** (f) **NCPH** in dark conditions and on exposure to different light sources for 15 min.

#### 4. Selectivity studies in liquid phase

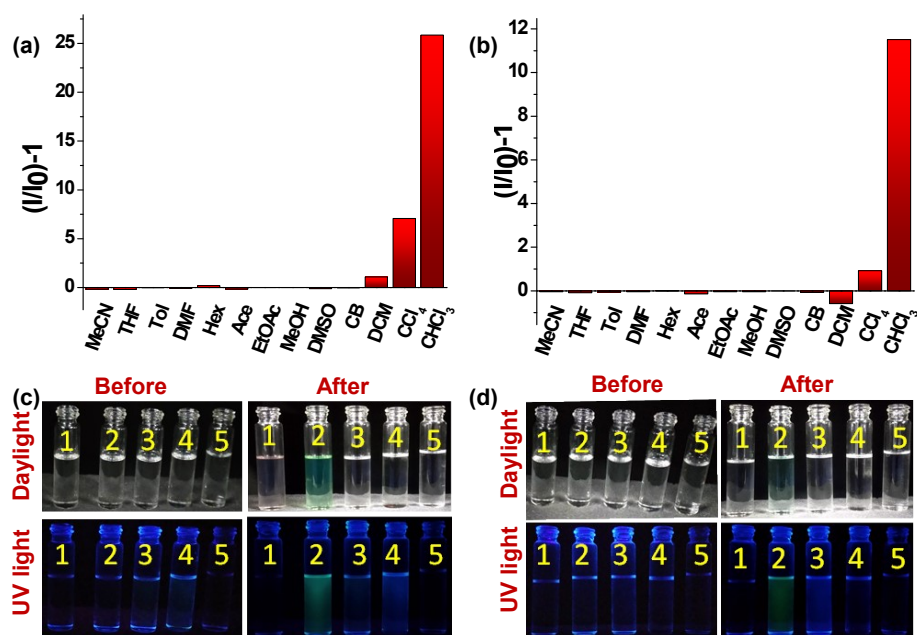

**Fig. S2:** Selectivity study of (a) **NBPh** and (b) **NCPH** molecule (20  $\mu\text{M}$ ) in the presence of other common solvents such as acetonitrile, tetrahydrofuran, toluene, dimethylformamide, hexane, acetone, ethyl acetate, methanol, dimethyl sulfoxide, chlorobenzene, 1,2 dichloroethane, carbon tetrachloride, chloroform (from left to right). Digital photograph of (c) **NBPh** and (d) **NCPH** in different solvents (inset 1. carbon tetrachloride, 2. chloroform, 3. 1,2-dichloromethane, 4. chlorobenzene, 5. methanol) before and after irradiation for 15 min under 365 nm light.

## 5. Photoluminescence kinetics spectra

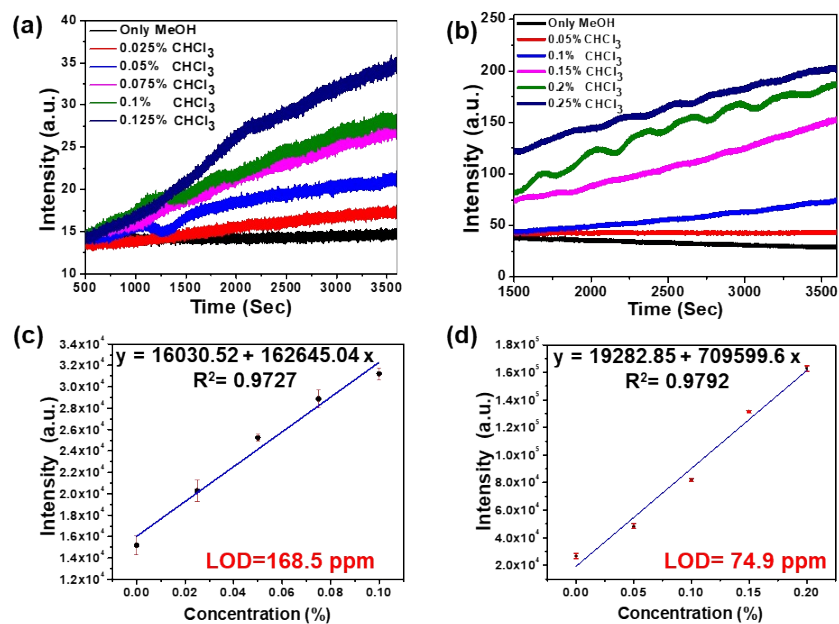

**Fig. S3:** Photo-luminescence kinetics spectra of (a) **NBPh** and (b) **NCPH** (20 μM) with increasing percentage of chloroform recorded up to 1 hour in methanol at room temperature. Fluorescence response of (c) **NBPh** and (d) **NCPH** (20 μM) taken in methanol as a function of chloroform percentage.

## 6. UV/Visible spectra

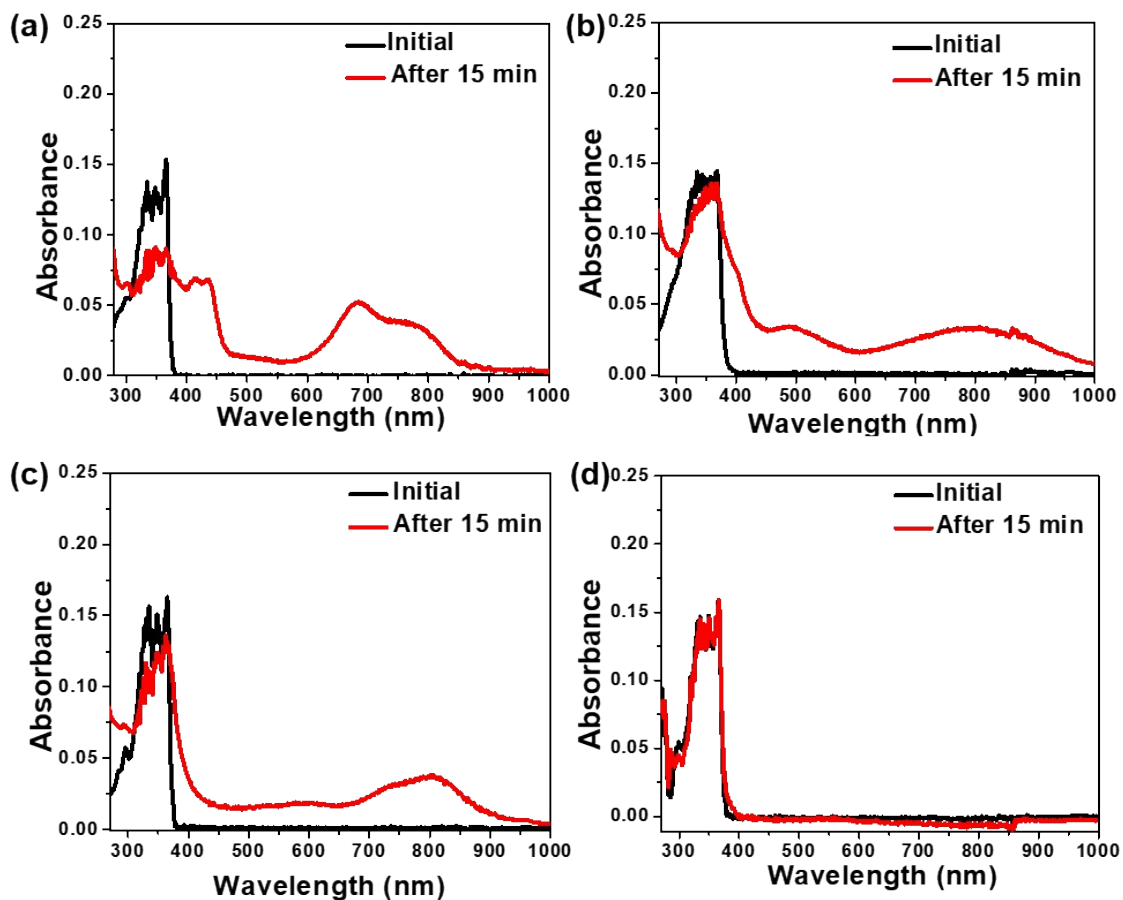

**Fig. S4:** UV/Visible spectra of NBMe in (a)  $\text{CHCl}_3$ , (b)  $\text{CCl}_4$ , (c)  $\text{CH}_2\text{Cl}_2$  (d) PhCl before and after UV irradiation.

**7. Table S2:** Representation of CIE coordinates for the final emission of **NBMe** probe after 15 min of exposure at 330 nm light excitation in the corresponding solvent.

| Name of the Solvent       | X Coordinate | Y coordinate |
|---------------------------|--------------|--------------|
| $\text{CHCl}_3$ ( $a_1$ ) | 0.153401     | 0.255429     |
| $\text{CCl}_4$ ( $b_1$ )  | 0.19652      | 0.185147     |
| DCM ( $c_1$ )             | 0.158929     | 0.191955     |
| PhCl ( $d_1$ )            | 0.15774      | 0.043031     |



## 8. Time-resolved fluorescence spectra

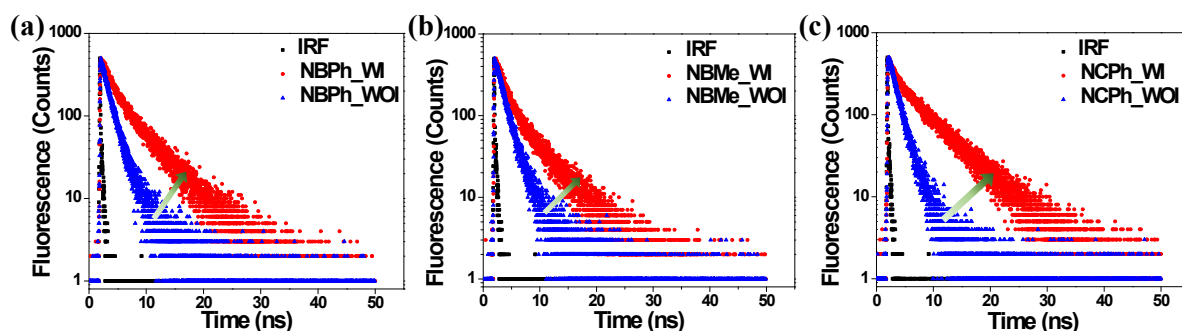

**Fig. S5:** Time-resolved fluorescence spectra of (a) **NBPh** (b) **NBMe** (c) **NCPH** (20  $\mu\text{M}$ ) in chloroform with irradiation (WI) and without irradiation of UV light.

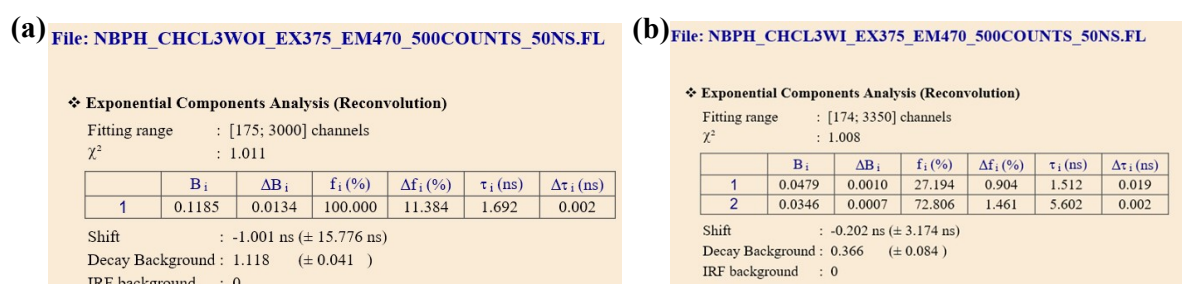

**Fig. S6:** Fitting parameters and IRF values correspond to lifetime measurements of **NBPh** probe in chloroform (a) Without irradiation (WOI), (b) With irradiation (WI)

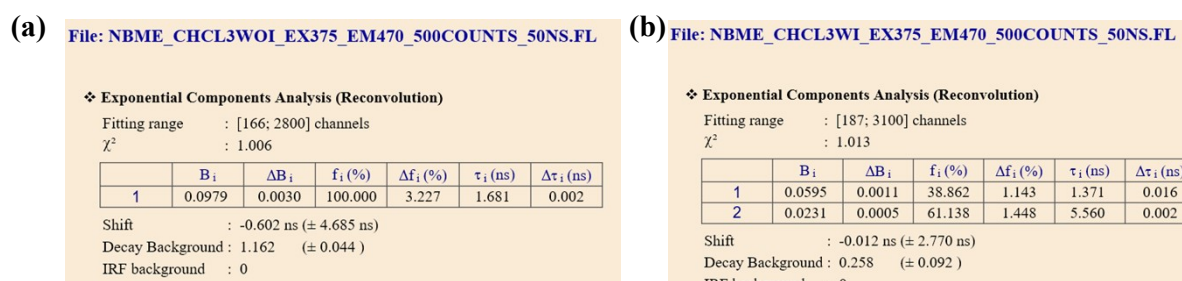

**Fig. S7:** Fitting parameters and IRF values correspond to lifetime measurements of **NBMe** probe in chloroform (a) Without irradiation (WOI), (b) With irradiation (WI)

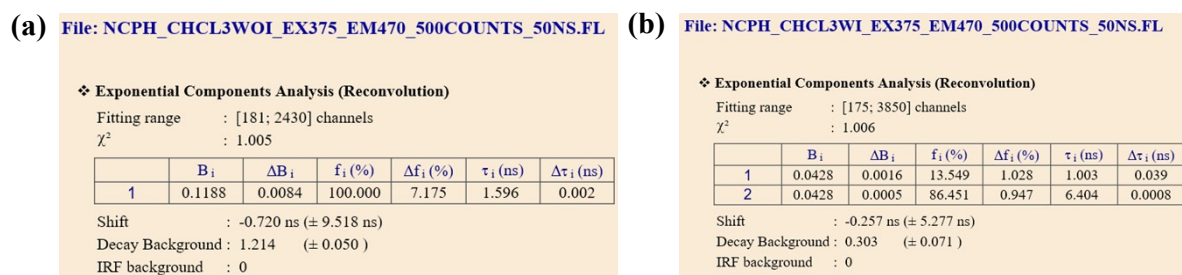

**Fig. S8:** Fitting parameters and IRF values correspond to lifetime measurements of **NCPH** probe in chloroform (a) Without irradiation (WOI), (b) With irradiation (WI)

## 9. ESR Spectra

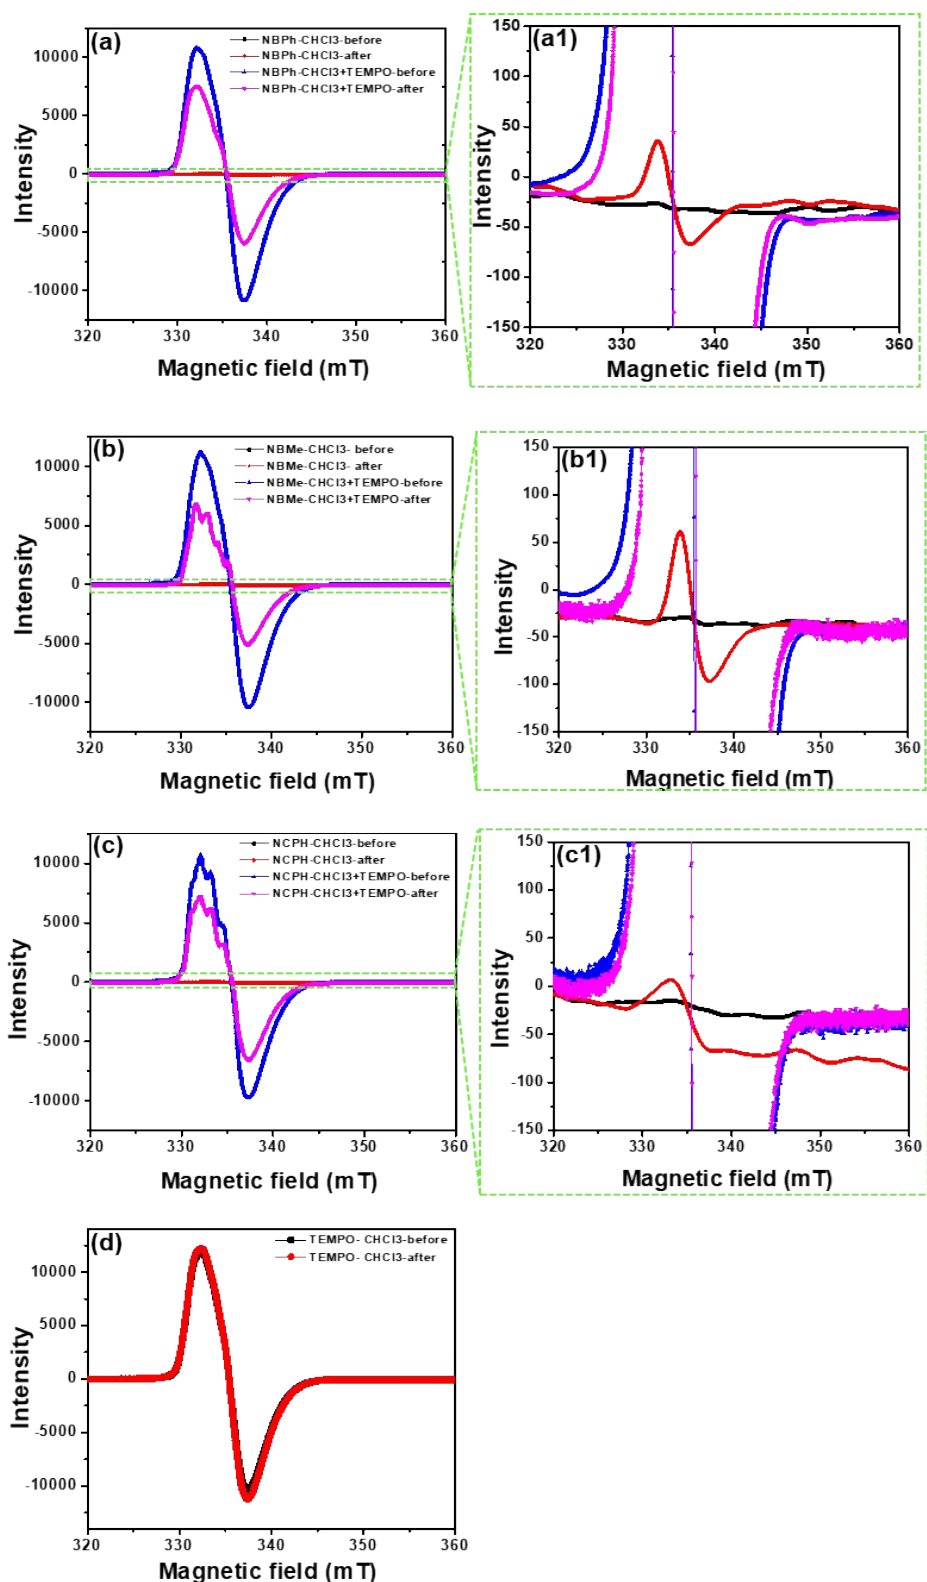

**Fig. S9:** ESR spectra of (a) **NBPh** (b) **NBMe** (c) **NCPH** with and without 1 equivalent of TEMPO in chloroform (10mM) before and after the exposure to 365 nm sources for 5 min (left). (a1), (b1), and (c1) represents the magnified portion of the corresponding ESR spectra (right).



## 12. NMR and FTIR Titration

For NMR titration, 1 mg of the probe (**NBMe**, **NBPh**, **NCPH**) was dissolved in 500  $\mu\text{L}$   $\text{CDCl}_3$  solution and NMR spectra was recorded instantly under dark condition. Then the same solution was kept under 365 nm UV light and spectra was recorded with the mentioned time. For FTIR titration, 1 mg of the probe (**NBMe**, **NBPh**, **NCPH**) was dissolved in 500  $\mu\text{L}$  chloroform solution and followed the same procedure of NMR titration.

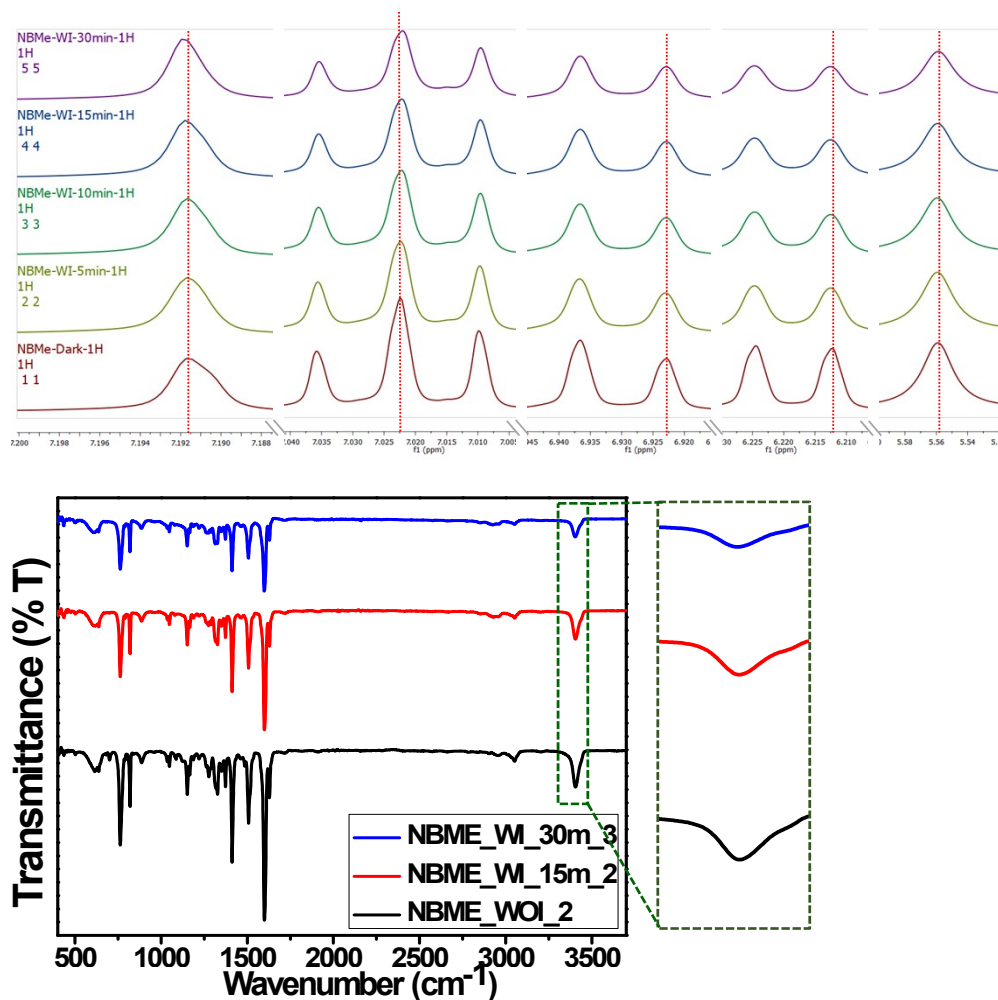

**Fig. S12:** (above) Partial  $^1\text{H}$ -NMR spectra for the titration of **NBMe** molecules in the presence of deuterated chloroform under dark state and with irradiation (WI) of 365 nm UV light with time up to 30 min. (below) FTIR spectra of **NBMe** molecules in chloroform without irradiation (WOI), with irradiation (WI) after 15 min and 30 min.

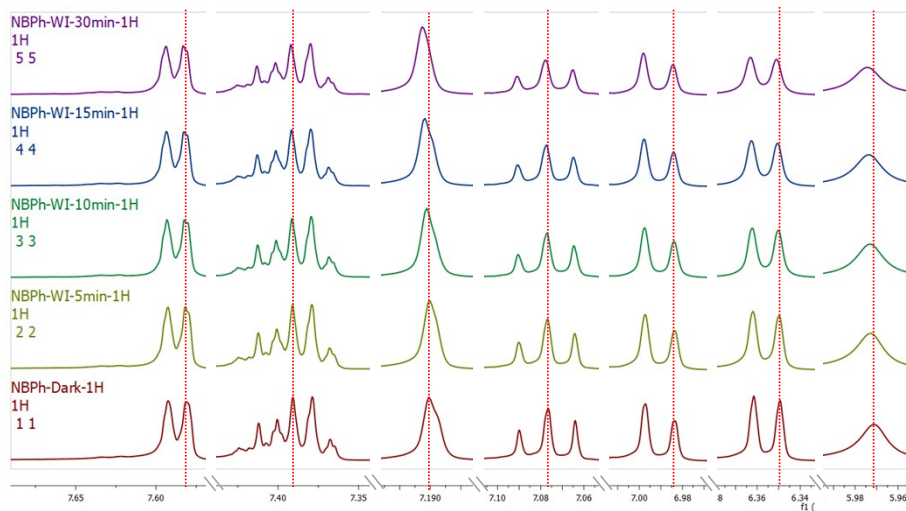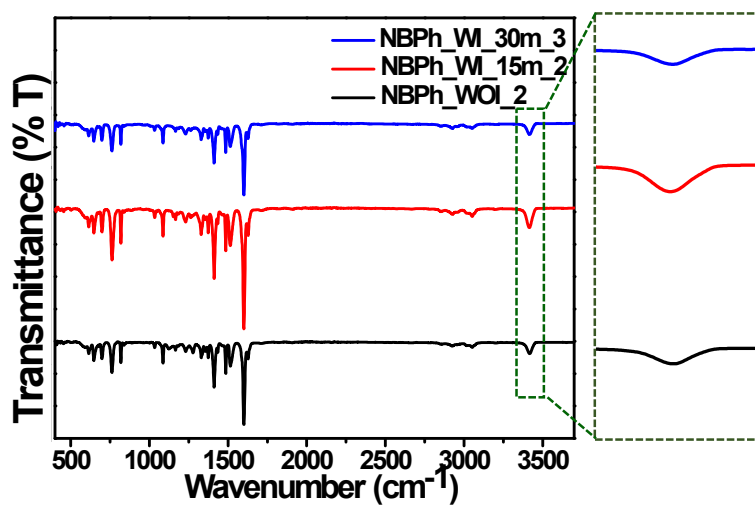

**Fig. S13:** (above) Partial  $^1\text{H-NMR}$  spectra for the titration of **NBPh** molecules in presence of deuterated chloroform under dark state and with irradiation (WI) of 365 nm UV light with time up to 30 min. (below) FTIR spectra of **NBPh** molecules in chloroform without irradiation (WOI), with irradiation (WI) after 15 min and 30 min.



### 13. Electrostatic potential diagram

Ground state geometry were optimized by density functional theory (DFT) method using the B3LYP/6-31G basis set in Gaussian 09 software.<sup>14</sup> Then the electrostatic potential diagram was evaluated via using the optimized structure.

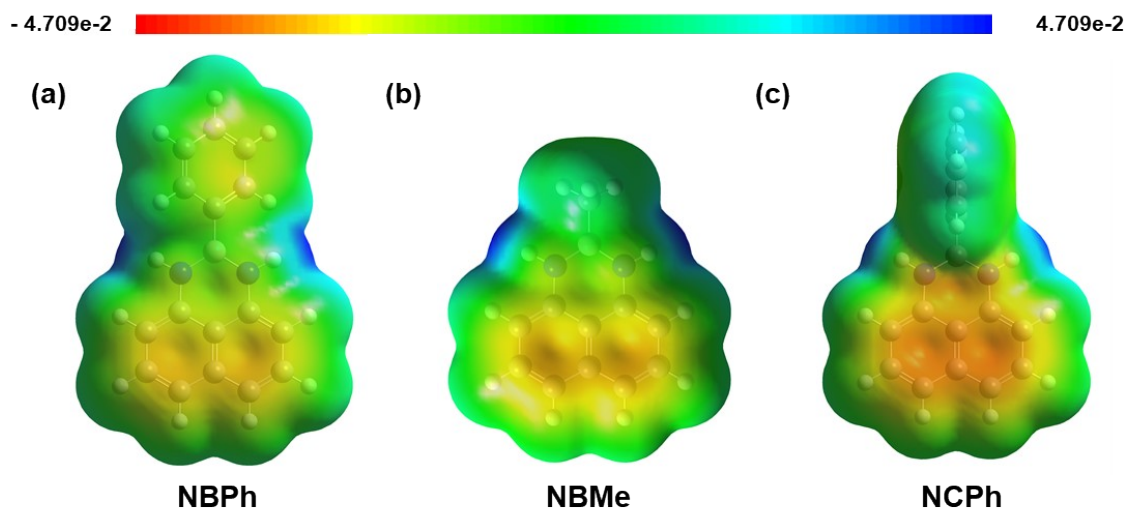

**Fig. S14:** Electrostatic potential diagram (ESP) of (a) NBPh (b) NBMe (c) NCPH calculated at B3LYP/6-31G.

### 14. Vapour phase study

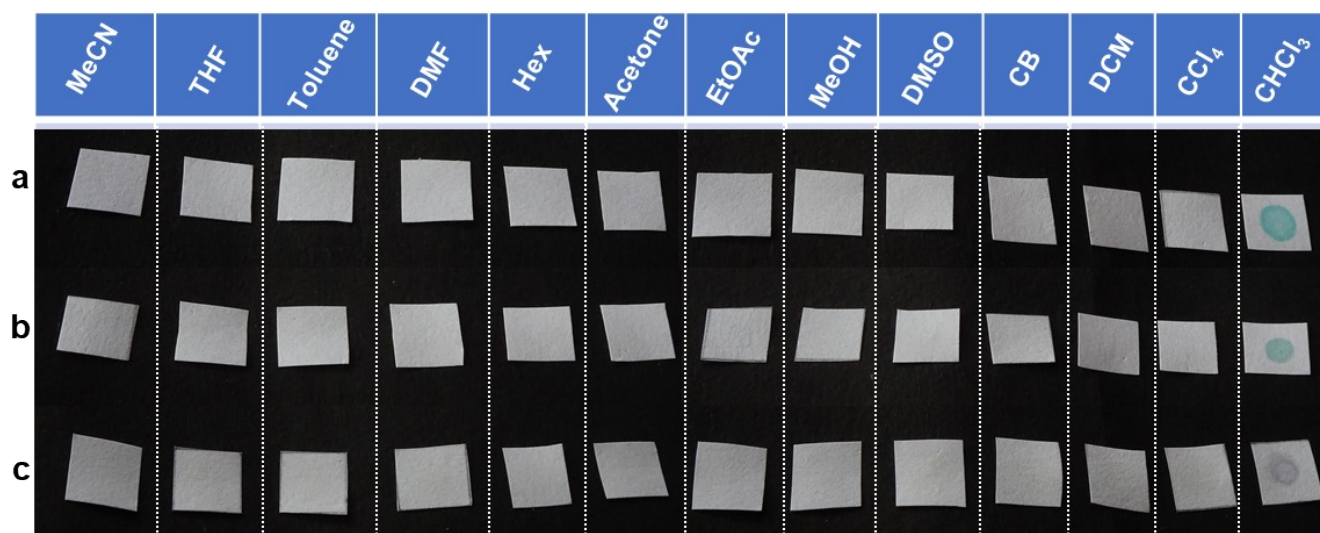

**Fig. S15:** Digital photographs illustrate the naked eye responses of (a) NBMe, (b) NBPh, (c) NCPH molecule in the presence of other common solvents such as acetonitrile, tetrahydrofuran, toluene, dimethylformamide, hexane, acetone, ethyl acetate, methanol, dimethyl sulfoxide, chlorobenzene, 1,2-dichloroethane, carbon tetrachloride, chloroform (from left to right).

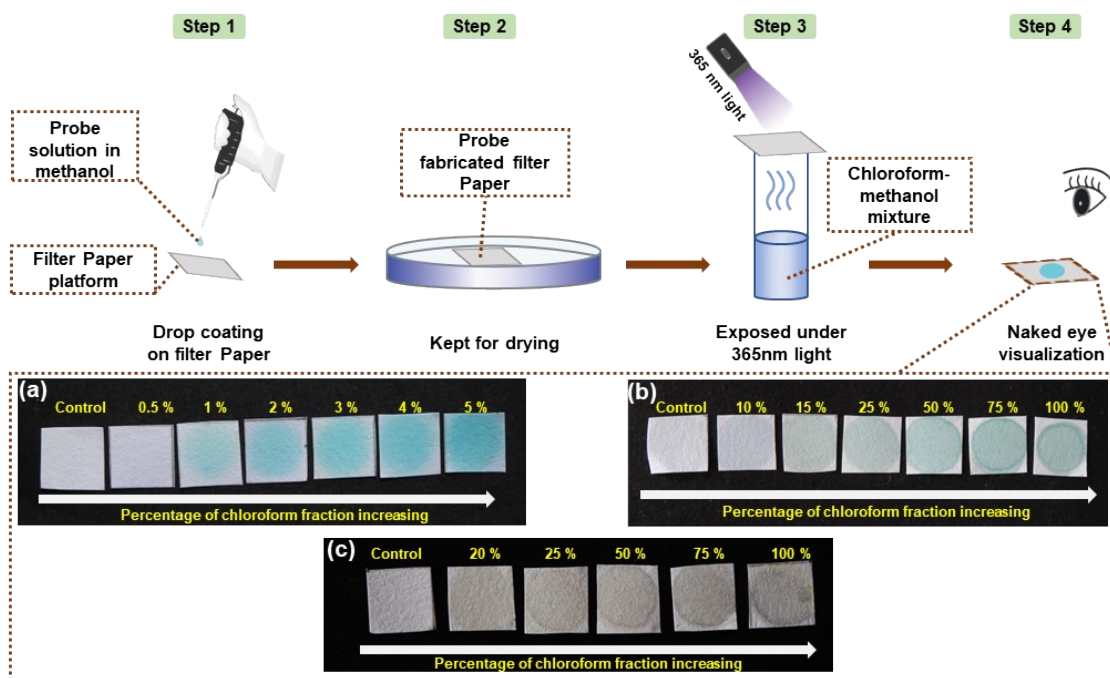

**Fig. S16:** Demonstrates a schematic representation for vapour phase chloroform detection process and the visual colour changes of the filter paper embedded with (a) NBMe, (b) NBPh, (c) NCPH up on increasing chloroform percentage.

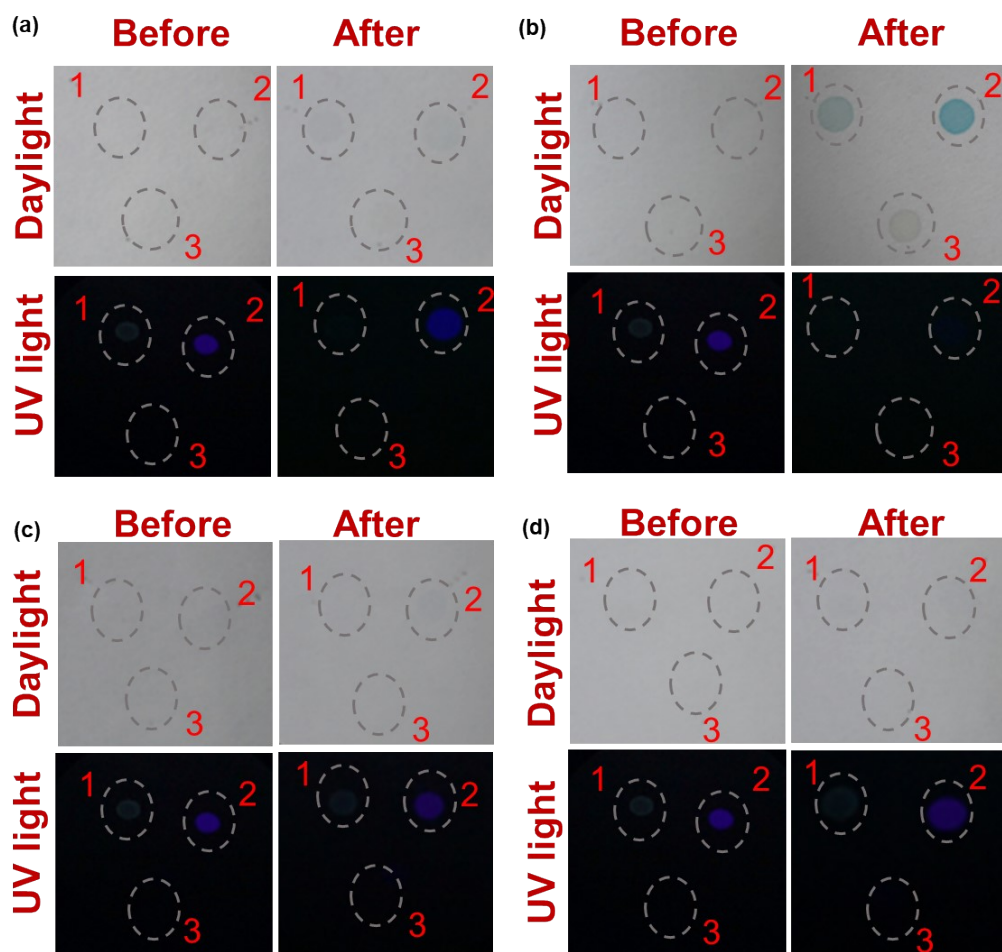

**Fig. S17:** Digital photographs depict the fluorescence and naked eye response of all three molecules (inset 1, **NBPh**; 2, **NBMe**; 3, **NCPH**) before and after the exposure of (a) carbon tetrachloride, (b) chloroform, (c) 1,2 dichloroethane, (d) chlorobenzene in presence of 365 nm light for 2 min.



15.  $^1\text{H-NMR}$ ,  $^{13}\text{C-NMR}$ , and Mass Spectra

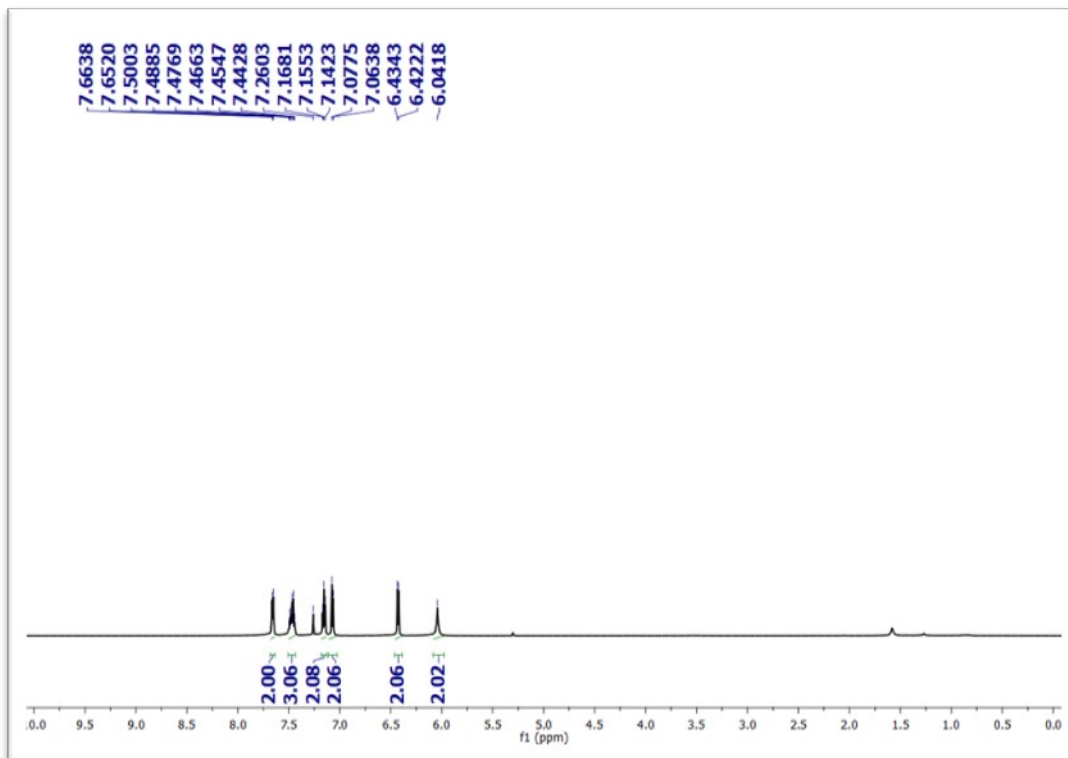

$^1\text{H-NMR}$  of NBPh

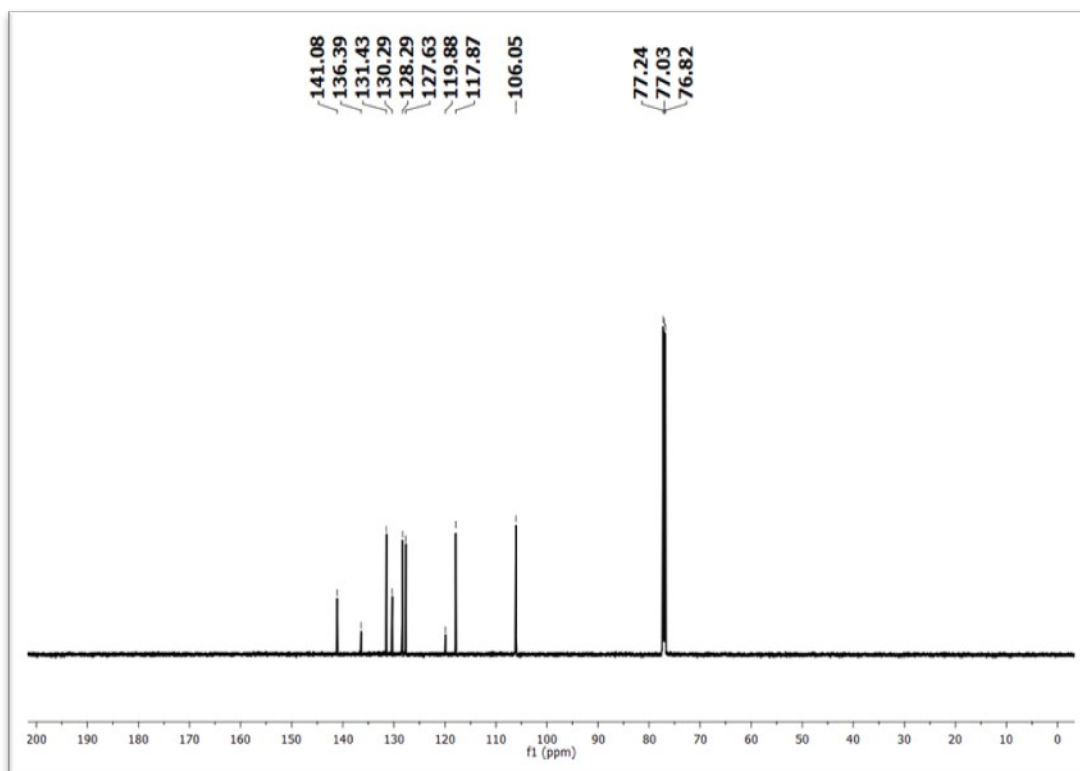

$^{13}\text{C-NMR}$  of NBPh

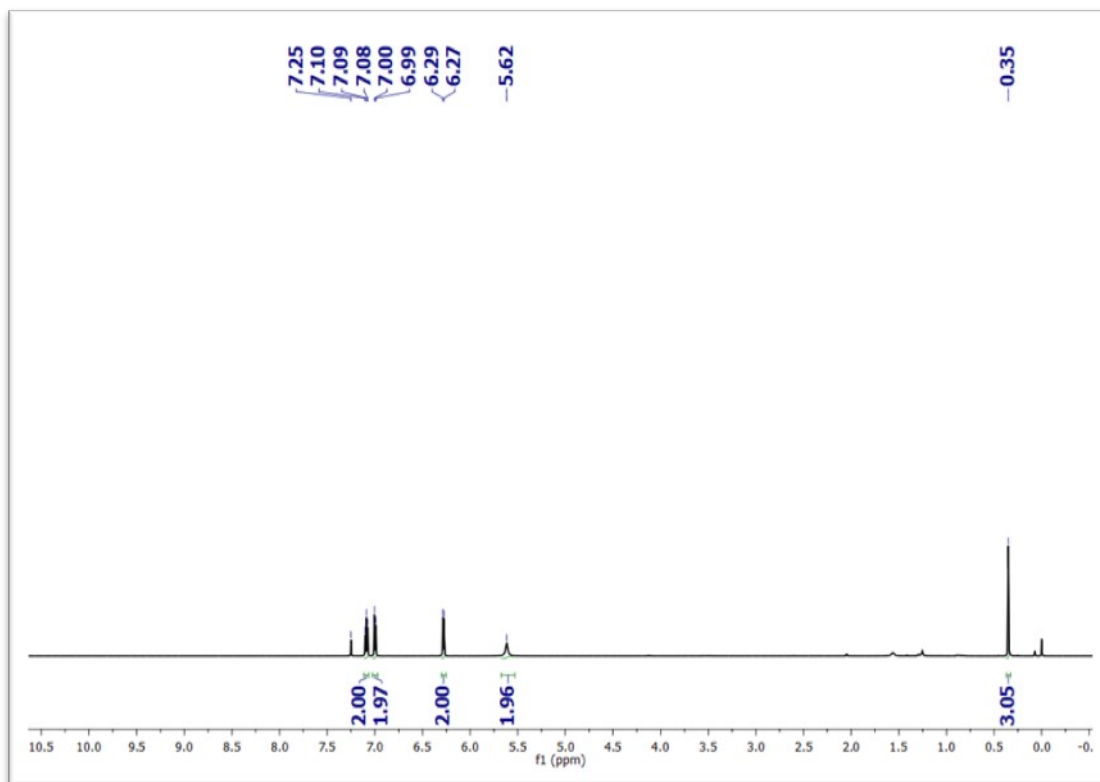

<sup>1</sup>H-NMR of NBMe

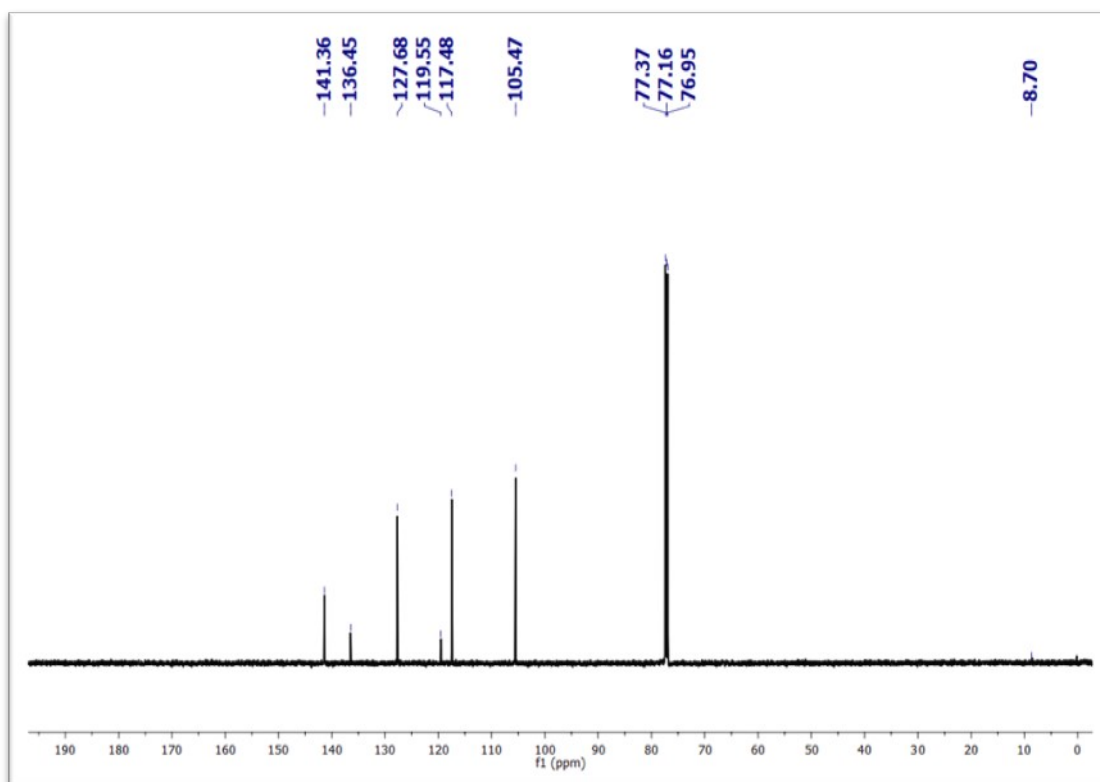

<sup>13</sup>C-NMR of NBMe

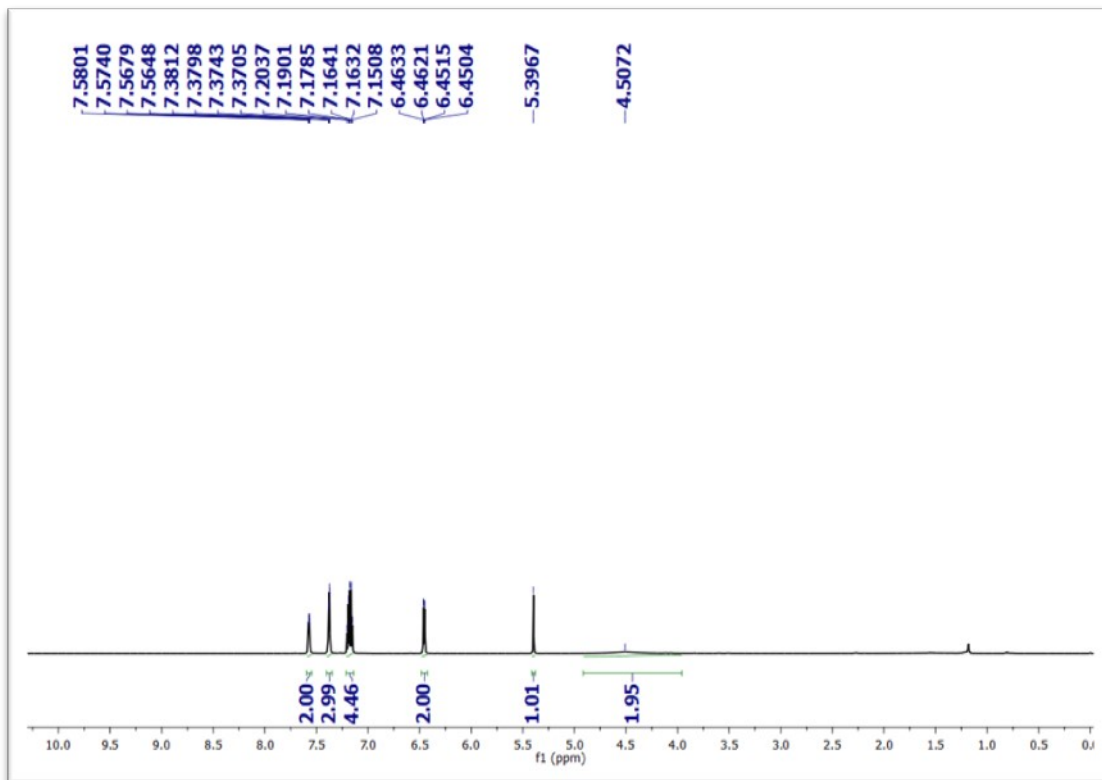

**<sup>1</sup>H-NMR of NCPH**

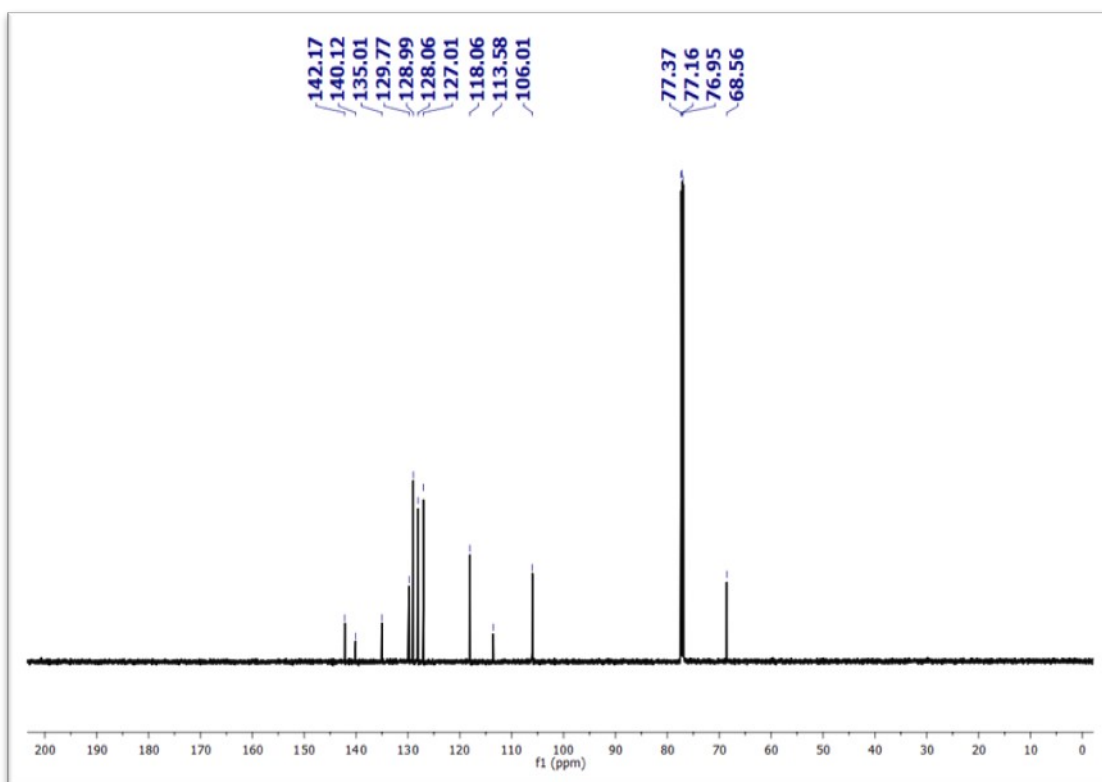

**<sup>13</sup>C-NMR of NCPH**

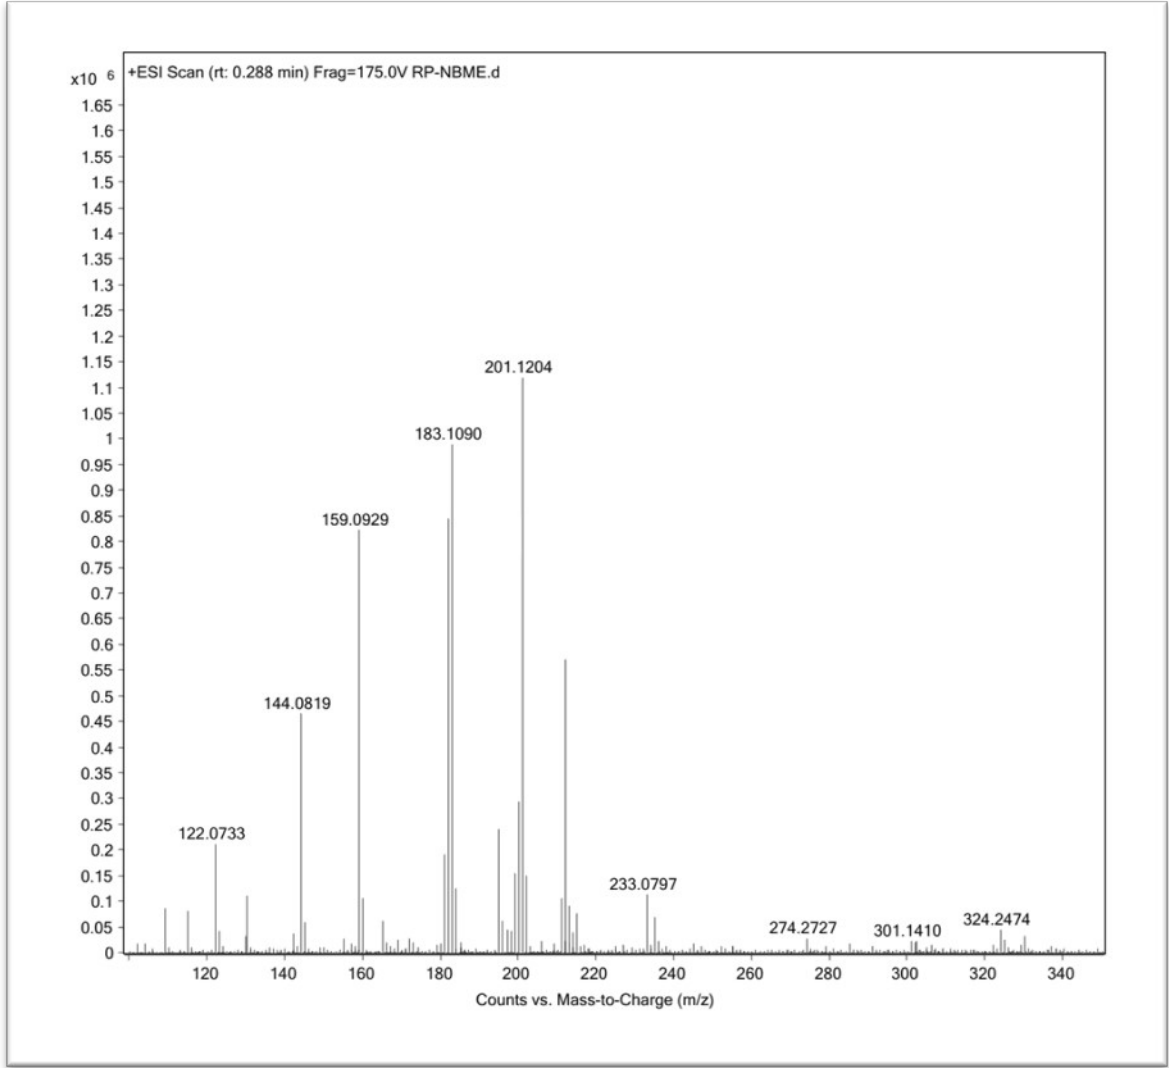

Mass spectra of NBMe

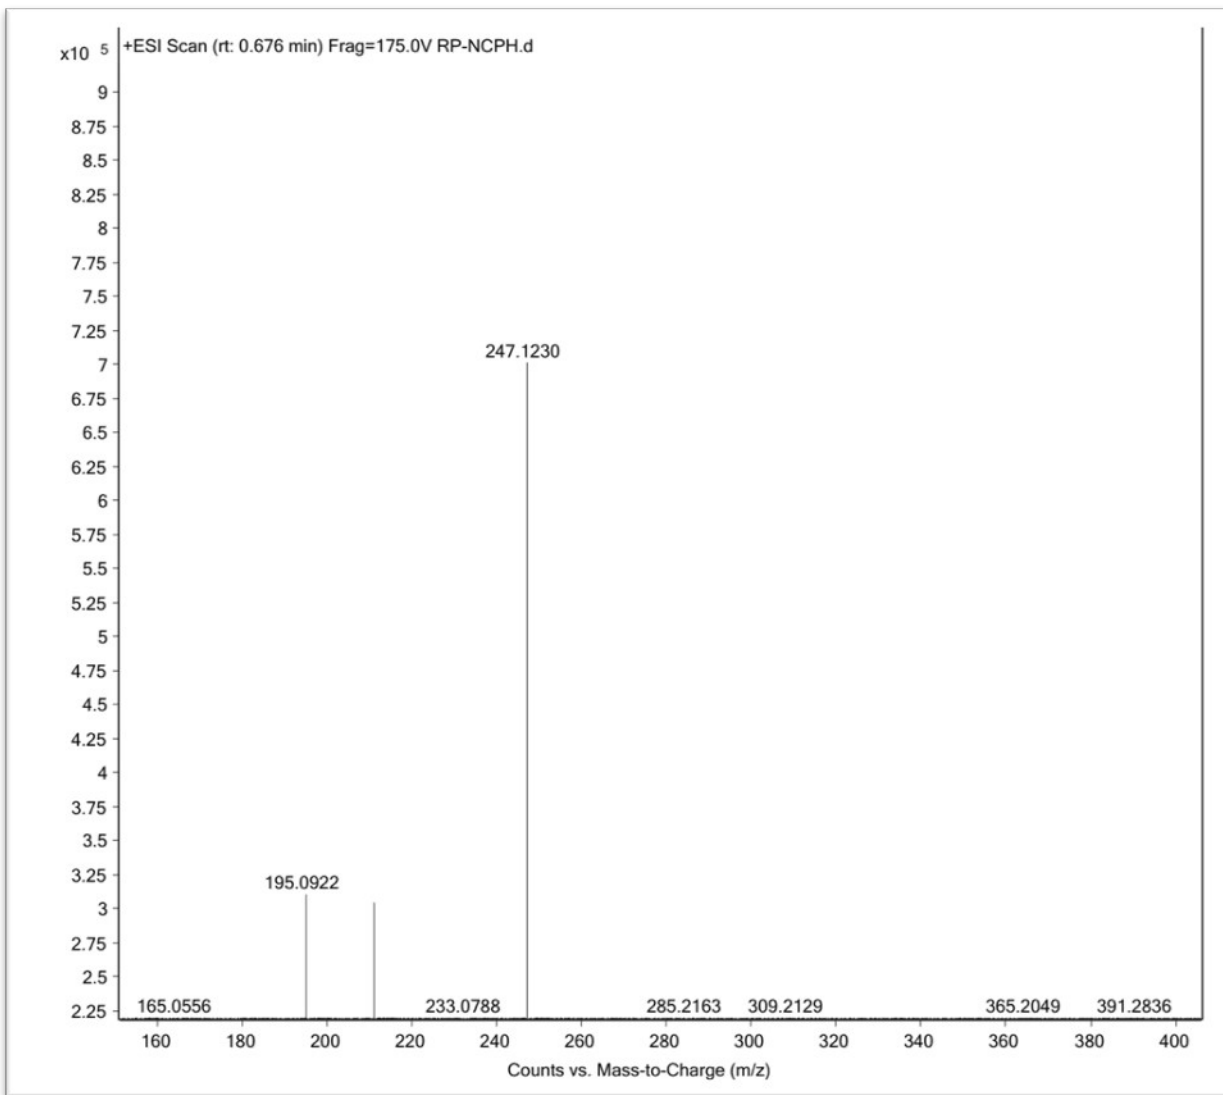

**Mass spectra of NCPH**

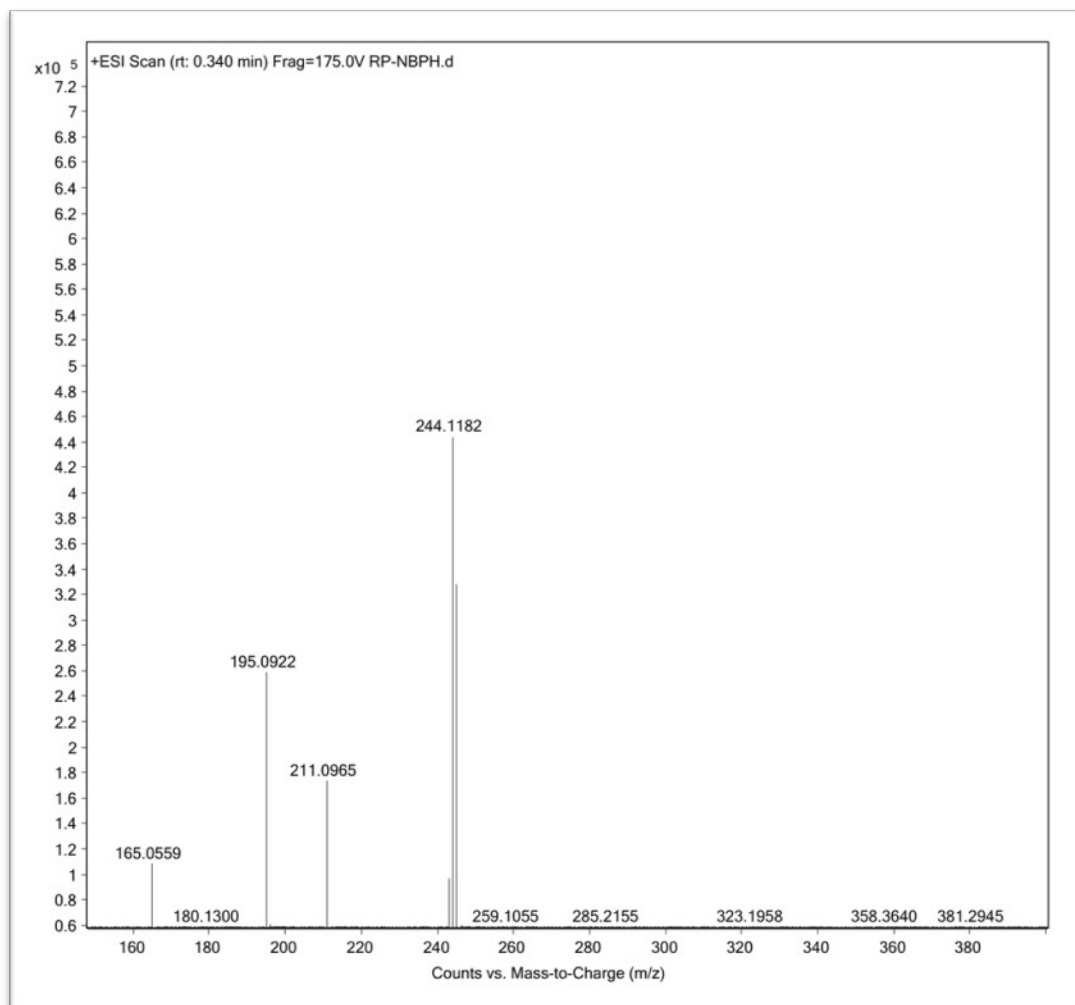

**Mass spectra of NBPh**

## 16. References:

1. W.-M. Wan, D. Tian, Y.-N. Jing, X.-Y. Zhang, W. Wu, H. Ren and H.-L. Bao, *Angew. Chem. Int. Ed.*, 2018, **57**, 15510-15516.
2. J. Lee, H. T. Chang, H. An, S. Ahn, J. Shim and J.-M. Kim, *Nat. Commun.*, 2013, **4**, 2461.
3. Q. Wu, H. Ma, K. Ling, N. Gan, Z. Cheng, L. Gu, S. Cai, Z. An, H. Shi and W. Huang, *ACS Appl. Mater. Interfaces*, 2018, **10**, 33730-33736.
4. M. Borelli, G. Iasilli, P. Minei and A. Pucci, *Molecules*, 2017, **22**.
5. P. Kar and A. Choudhury, *Sens. Actuators, B*, 2013, **183**, 25-33.
6. R.-Q. Zhang, L.-B. Wang, R.-X. Bai, Y.-L. Luo, F. Xu and Y.-S. Chen, *Composites, Part B*, 2019, **173**, 106894.
7. X. Zhang, Z. Qin, X. Liu, B. Liang, N. Liu, Z. Zhou and M. Zhu, *J. Mater. Chem. A*, 2013, **1**, 10327-10333.
8. L. Dai, D. Wu, Q. Qiao, W. Yin, J. Yin and Z. Xu, *Chem. Commun.*, 2016, **52**, 2095-2098.
9. S. A. A. Razavi, M. Y. Masoomi and A. Morsali, *Chem. Eur. J.*, 2017, **23**, 12559-12564.
10. K. Yamaguchi, T. Murai, Y. Tsuchiya, Y. Miwa, S. Kutsumizu, T. Sasamori and N. Tokitoh, *RSC Adv.*, 2017, **7**, 18132-18135.
11. R. Campos, J. F. Reuther, N. R. Mammoottil and B. M. Novak, *Macromolecules*, 2017, **50**, 4927-4934.
12. I. Z. Mohamad Ahad, S. Wadi Harun, S. N. Gan and S. W. Phang, *Sens. Actuators, B*, 2018, **261**, 97-105.
13. Leeladhar and J. P. Singh, *Sens. Actuators, A*, 2019, **296**, 87-91.
14. P. Geerlings, F. De Proft and W. Langenaeker, *Chem. Rev.*, 2003, **103**, 1793-1874.
